# Supplementary material for: A comparative study of the catalytic activity of nanosized oxides in the one-pot synthesis of highly substituted dihydropyridines
Source: Royal Society of Chemistry journal article supplement (doi:10.1039/c4ra14557g), 2015-01-01
Supplement: c4ra14557g1.pdf [file c4ra14557g1.pdf]

## **Supplementary information**

### **A comparative study of the catalytic activity of nanosized oxides in the one pot synthesis of highly substituted dihydropyridines**

**Javad Safaei-Ghomi,\* Elham Heidari-Baghbahadorani, Hossein Shahbazi-Alavi,  
Mehrnoosh Asgari-Kheirabadi**

*Department of Organic Chemistry, Faculty of Chemistry, University of Kashan, Kashan, P.O.  
Box 87317-51167, I. R. Iran Corresponding author. E-mail addresses: safaei@kashanu.ac.ir,  
Fax: +98-361-5912397; Tel.: +98-361-5912385*

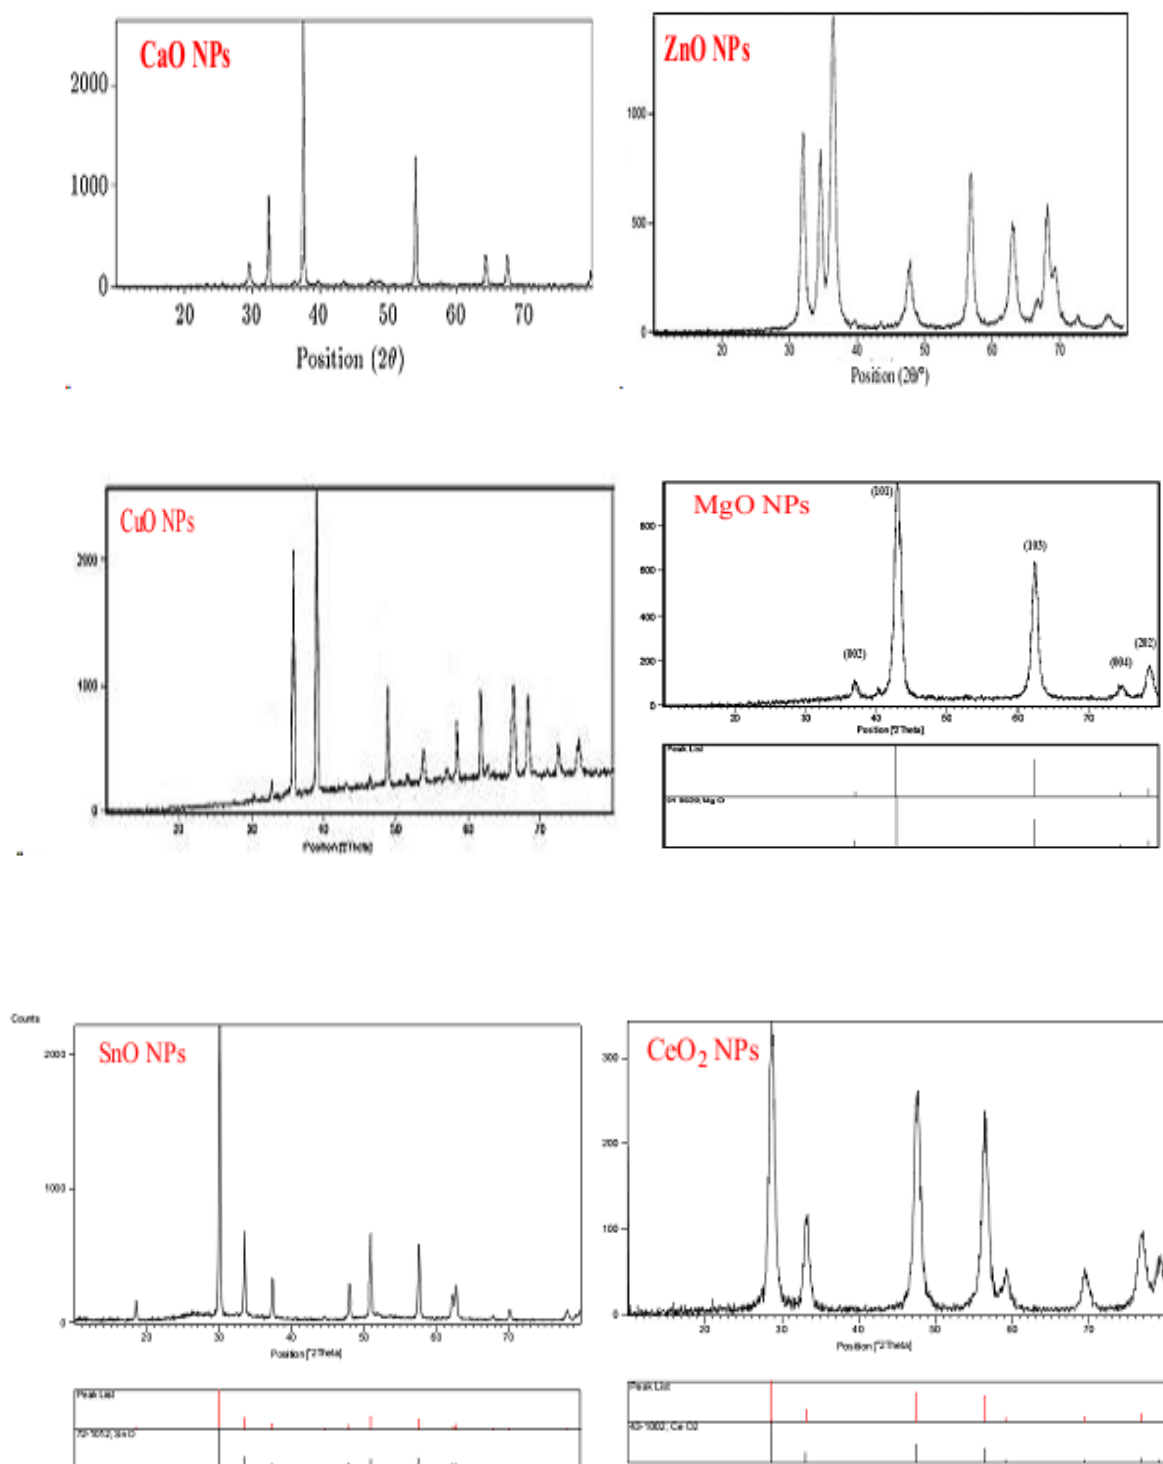

**Figure 1.** XRD pattern of nanosized oxides

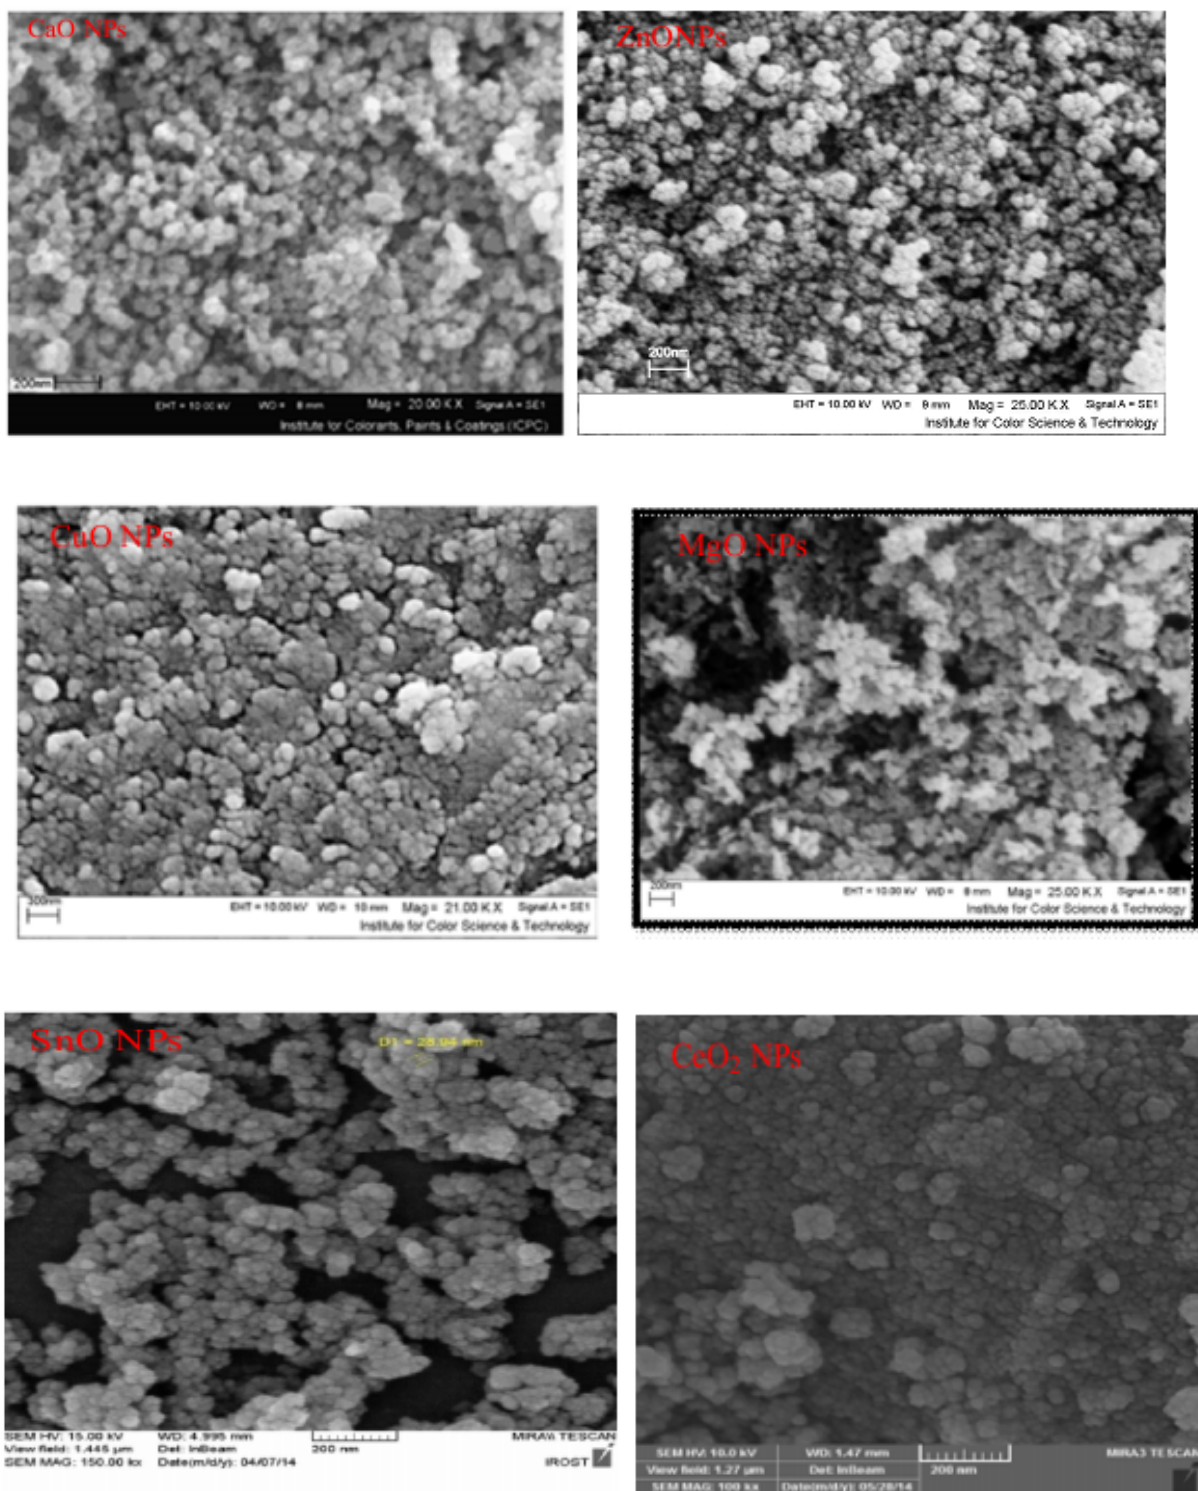

**Figure 2.** SEM images of nanosized oxides

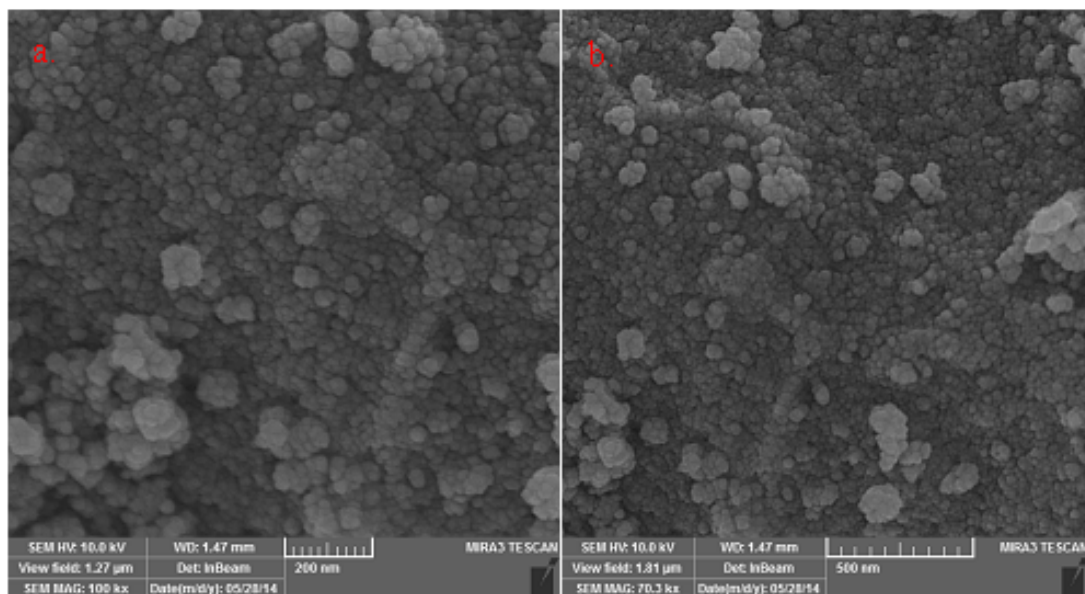

**Figure 4.** SEM images of CeO<sub>2</sub> NPs before use (a) and after reuse of five times (b)
